# Supplementary material for: A Nutrigenetic Strategy for Reducing Blood Lipids and Low-Grade Inflammation in Adults with Obesity and Overweight
Source: MDPI journal article supplement (doi:10.3390/nu15204324), 2023-10-10
Supplement: s1 [file s1]

# Supplementary Materials

**Table S1.** General Information about genotyping assay.

| Gene         | Name                                             | SNP ID    | Location         | Catalog number             | Contetext Sequence [VIC/FAM]                                 |
|--------------|--------------------------------------------------|-----------|------------------|----------------------------|--------------------------------------------------------------|
| <i>FABP2</i> | Fatty acid binding protein 2                     | rs1799883 | Chr.4:119320747  | 4351379<br>C___761961_10   | AACAACCTCAATGTTTCGAAAAG[C/T]GCTTGATTCTTTGACTGTG<br>AATTTA    |
| <i>PPARG</i> | Peroxisome proliferator-activated receptor gamma | rs1801282 | Chr.3:12351626   | 4362691<br>C___1129864_10  | AACCTCTGGGAGATTCTCTATTGAC[C/G]CAGAAAGCGATTCTTC<br>ACTGATAC   |
| <i>LPL</i>   | Lipoprotein Lipase                               | rs13702   | Chr.8:19966981   | 4351379<br>C___9639448_10  | GGAACCTCTGGCTCCGAAAAAATTG[C/T]TATATATATCAAGGATG<br>TTCTGGCT  |
| <i>APOA5</i> | Apolipoprotein A5                                | rs662799  | Chr.11:116792991 | 4351379<br>C___2310403_10  | GAGCCCCAGGAAGCTGGAGCGAAAGT[A/G]AGATTGCCCCATGAG<br>GAAAAGCTG  |
| <i>APOA1</i> | Apolipoprotein A1                                | rs670     | Chr.11:116837697 | 4351379<br>C___2679585_20  | GCTGGGAGGCTGATAAGCCCAGCCC[C/T]GGCCCTGTT-<br>GCTGCTCACTGGTCCT |
| <i>APOC3</i> | Apolipoprotein C3                                | rs5128    | Chr.11:116832924 | 4351379<br>C___8907537_1_  | AAGTCCACCTGCCTATCCATCCTGC[C/G]AGCTCCTGGGTCTG-<br>CAATCTCCA   |
| <i>APOE</i>  | Apolipoprotein E                                 | rs7412    | Chr.19:44908822  | 4351379<br>C___904973_10   | CCGCGATGCCGATGACCTGCAGAAG[C/T]GCCTGGCAGTGAC-<br>CAGGCCGGGGC  |
|              |                                                  | rs429358  | Chr.19:44908684  | 4351379<br>C___3084793_20  | GCTGGGCGCGGACATGGAGGACGTG[C/T]GCGGCCGCTGGTGCA<br>GTACCGCGG   |
| <i>ABCA1</i> | ATP binding cassette transporter 1               | rs9282541 | Chr.9:104858554  | 4351379<br>C___11720861_10 | GGCTTCAGGATGTCCATGTTGGAAC[A/G]AAGTACTCGCTCTGCTG<br>CAGCCAGT  |
| <i>CETP</i>  | Cholesteryl ester transfer protein               | rs708272  | Chr.16:56962376  | 4351379<br>C___9615318_10  | CTGAGACCCAGAATCACTGGGGTTC[A/G]AGTTAGGGTTCAGATCT<br>GAGCCAGG  |
| <i>LIPC</i>  | Lipase C. Hepatic                                | rs1800588 | Chr.15:58431476  | 4351379<br>C___8757333_30  | GCTTCTTCGTGAGCTCCTTTTGACA[C/T]GGGGGTGAAGGGTTTCT<br>GCACCAC   |

SNP Genotyping/ TaqMan Assays ThermoFisher Scientific: <https://www.thermofisher.com>.

**Table S2.** Genotypic frequencies (GF) of the study population vs. reported in database.

| Gene         | SNP       | Alleles | MAF <sup>1</sup> | MAF Reported | HWE   |
|--------------|-----------|---------|------------------|--------------|-------|
| <i>LIPC</i>  | rs1800588 | C/T     | 0.472 (T)        | 0.461(T)     | 0.915 |
| <i>LPL</i>   | rs13702   | T/C     | 0.260 (C)        | 0.278 (C)    | 0.968 |
| <i>FABP2</i> | rs1799883 | G/A     | 0.252 (A)        | 0.260 (A)    | 0.906 |
| <i>ABCA1</i> | rs9282541 | C/T     | 0.068 (T)        | 0.120 (T)    | 0.838 |
| <i>CETP</i>  | rs708272  | G/A     | 0.412 (A)        | 0.467 (A)    | 0.997 |
| <i>PPARG</i> | rs1801282 | C/G     | 0.132 (G)        | 0.113(G)     | 0.811 |
| <i>APOA5</i> | rs662799  | T/C     | 0.156 (C)        | 0.160 (C)    | 1.000 |
| <i>APOC3</i> | rs5128    | C/G     | 0.184 (G)        | 0.172 (G)    | 0.764 |
| <i>APOA1</i> | rs670     | G/A     | 0.272 (A)        | 0.300 (A)    | 0.730 |
| <i>APOE</i>  | rs429358  | T/C     | 0.124 (C)        | 0.079 (C)    | 0.674 |
|              | rs7412    | C/T     | 0.040 (T)        | 0.018 (T)    | 0.984 |

MAF<sup>1</sup>: Minor Allele Frequency regarding this study population; MAF Reported from 1000 Genomes and the International HapMap project databases. HWE: Hardy-Weinberg equilibrium; HWE is expressed as *p* value.

**Table S3.** Genotype codifications of single specific SNPs statistically associated with TGs and VLDL-c decrease by diets.

| STANDARD DIET      |      |           |                |               |       |           |                |      | NUTRIGENETIC DIET     |      |           |                |               |       |           |                |              |
|--------------------|------|-----------|----------------|---------------|-------|-----------|----------------|------|-----------------------|------|-----------|----------------|---------------|-------|-----------|----------------|--------------|
| <i>LPL rs13702</i> |      |           |                |               |       |           |                |      | <i>LIPC rs1800588</i> |      |           |                |               |       |           |                |              |
| $\Delta$ TGs       |      |           |                | $\Delta$ VLDL |       |           |                |      | $\Delta$ TGs          |      |           |                | $\Delta$ VLDL |       |           |                |              |
| n                  | Mean | Std error | <i>p</i> value | n             | Mea n | Std error | <i>p</i> value |      | n                     | Mean | Std error | <i>p</i> value | n             | Mea n | Std error | <i>p</i> value |              |
| Risk (TC + CC)     | 2    | 90.50     | 34.50          | 0.08          | 2     | 18.00     | 7.00           | 0.08 | Risk (CT+ TT)         | 12   | 73.42     | 26.72          | <b>0.006</b>  | 12    | 14.75     | 5.32           | <b>0.006</b> |
| Non risk (TT)      | 34   | 9.26      | 10.80          |               | 34    | 1.91      | 2.15           |      | Non risk (CC)         | 30   | 16.40     | 6.70           |               | 30    | 3.33      | 1.35           |              |
| <i>APOA1 rs670</i> |      |           |                |               |       |           |                |      |                       |      |           |                |               |       |           |                |              |
| $\Delta$ TGs       |      |           |                | $\Delta$ VLDL |       |           |                |      |                       |      |           |                |               |       |           |                |              |
| n                  | Mean | Std error | <i>p</i> value | n             | Mea n | Std error | <i>p</i> value |      |                       |      |           |                |               |       |           |                |              |
| Risk (GA+ AA)      | 4    | -44.0     | 30.46          | 0.56          | 4     | -8.75     | 6.06           | 0.55 |                       |      |           |                |               |       |           |                |              |
| Non risk (GG)      | 32   | 21.0      | 10.98          |               | 32    | 4.25      | 2.18           |      |                       |      |           |                |               |       |           |                |              |

Data presented as mean  $\pm$  Standard error. Bold numbers indicate  $p < 0.05$ .  $\Delta$ TGs: delta of triglycerides;  $\Delta$ VLDL: delta of very-low density lipoprotein cholesterol.
